# Supplementary material for: Revealing hydrogen spillover pathways in reducible metal oxides
Source: Royal Society of Chemistry journal article supplement (doi:10.1039/d2sc00871h), 2022-01-01
Supplement: d2sc00871h1.pdf [file d2sc00871h1.pdf]

**Supplementary Information**

**Revealing Hydrogen Spillover Pathways in Reducible Metal Oxides**

Kazuki Shun,<sup>a</sup> Kohsuke Mori\*<sup>abc</sup>, Shinya Masuda,<sup>a</sup> Naoki Hashimoto,<sup>a</sup> Yoyo Hinuma,<sup>d</sup> Hisayoshi Kobayashi,<sup>e</sup> and Hiromi Yamashita\*<sup>abc</sup>

<sup>a</sup> Division of Materials and Manufacturing Science, Graduate School of Engineering, Osaka University, 2-1 Yamada-oka, Suita, Osaka 565-0871, Japan. Tel & FAX: +81-6-6879-7460, +81-6-6879-7457

E-mail: mori@mat.eng.osaka-u.ac.jp, yamashita@mat.eng.osaka-u.ac.jp

<sup>b</sup> Elements Strategy Initiative for Catalysts Batteries ESICB, Kyoto University, Katsura, Kyoto 615-8520, Japan.

<sup>c</sup> Innovative Catalysis Science Division, Institute for Open and Transdisciplinary Research Initiatives (ICS-OTRI), Osaka University, Suita, Osaka 565-0871, Japan.

<sup>d</sup> Department of Energy and Environment, National Institute of Advanced Industrial Science and Technology (AIST), Ikeda, Osaka 563-8577, Japan

<sup>e</sup> Kyoto Institute of Technology, Matsugasaki, Sakyo-ku, Kyoto 606-8585, Japan.

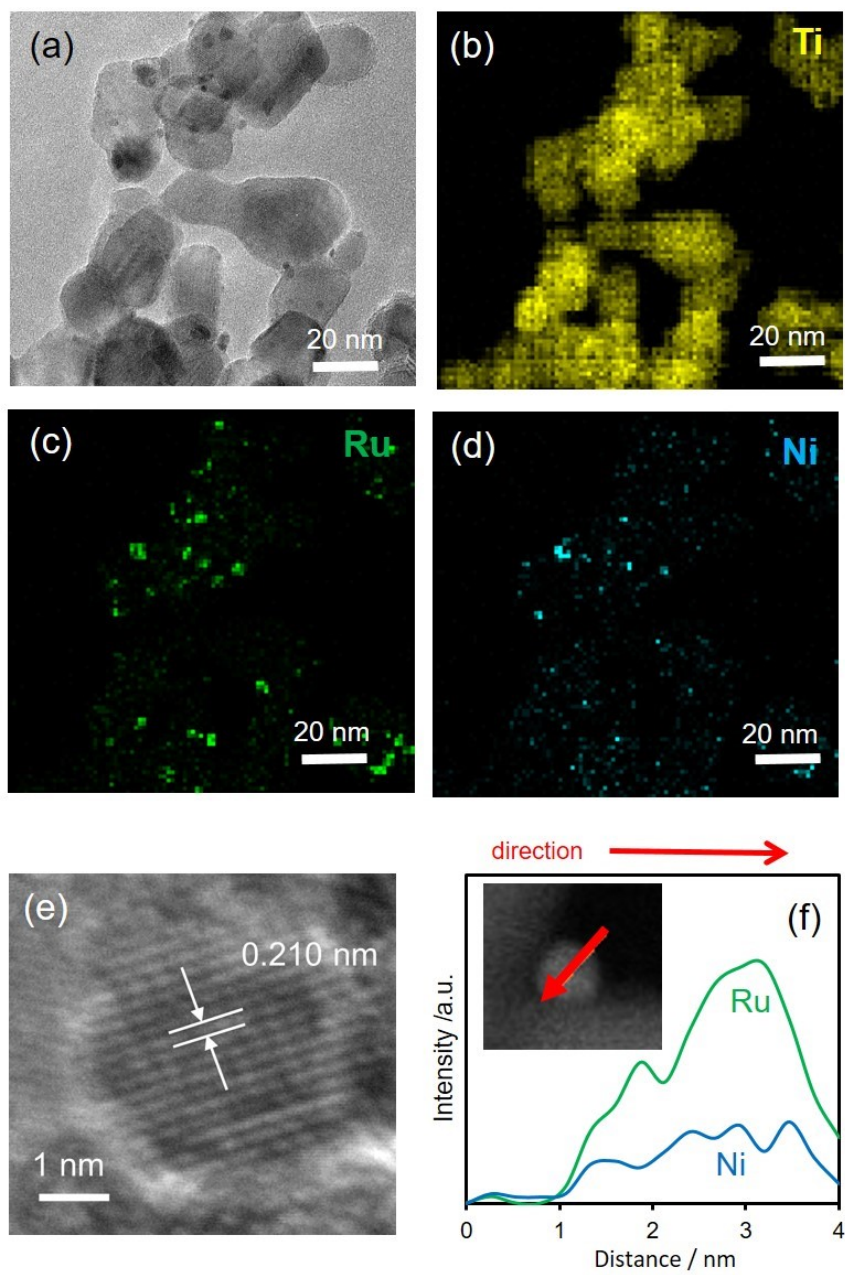

**Fig. S1.** (a) TEM image of RuNi/TiO<sub>2</sub>, EDX mapping of (b) Ti, (c) Ru, (d) Ni in the region indicated in (a), (e) lattice fringe of RuNi NP observed in the HR-TEM image, and (f) EDX line analysis of single nanoparticle.

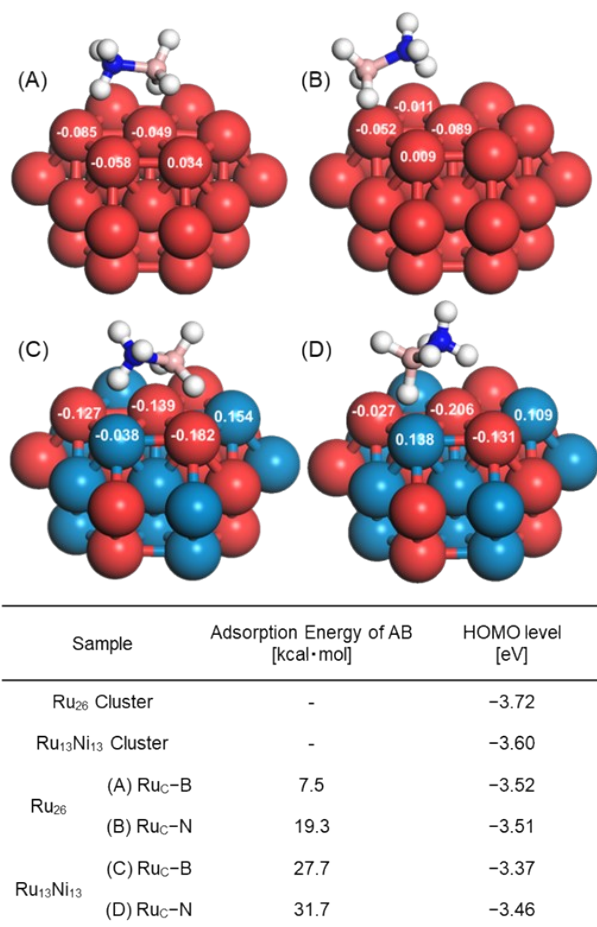

**Fig. S2.** Geometrically optimized adsorption energies of AB molecule on the Ru<sub>26</sub> or Ru<sub>13</sub>Ni<sub>13</sub> alloy cluster and HOMO level of each condition estimated from DFT calculations. Ru<sub>26</sub> cluster is used as the model in the case of (A), (B), and Ru<sub>13</sub>Ni<sub>13</sub> alloy cluster is used in the case of (C), (D).

DFT calculations, employing a Ru<sub>26</sub> and Ru<sub>13</sub>Ni<sub>13</sub> clusters as models of monometallic and alloy NPs, revealed that Ru atoms in the Ru<sub>13</sub>Ni<sub>13</sub> clusters are indeed negatively charged in comparison with Ru<sub>26</sub> cluster, while the Ni atoms have positive charges due to the electronic charge transfer from Ni to Ru. Additionally, the highest occupied molecular orbital (HOMO) state of the Ru<sub>13</sub>Ni<sub>13</sub> cluster is higher than that of monometallic Ru<sub>26</sub> cluster, which is calculated to be  $-3.60$  eV and  $-3.71$  eV, respectively. The change of electronic property by alloying also influences on the adsorption energy ( $E_{ad}$ ) of AB molecules. In the lowest-energy adsorption structure for Ru<sub>26</sub> cluster, AB interacts with surface Ru atoms through the boron atom and the centered Ru atom (Ru<sub>C</sub>), in which  $E_{ad}$  was estimated to be 7.5 kcal/mol (Fig. S2A). The opposite configuration is more stable and the  $E_{ad}$  was estimated to be 19.3 kcal/mol (Fig. S2B). As expected, the  $E_{ad}$  of both configurations for the Ru<sub>13</sub>Ni<sub>13</sub> cluster were estimated to be 27.7 and 31.7 kcal/mol, respectively (Fig. 2C and D), which are substantially larger than those on the Ru<sub>26</sub> cluster. Thus we can conclude that the neighboring Ru–Ni paired site with unique electronic property has a positive effect as an anchor on interaction with AB molecules, which ultimately enhances the catalytic activity.

(a) Ru/TiO<sub>2</sub>

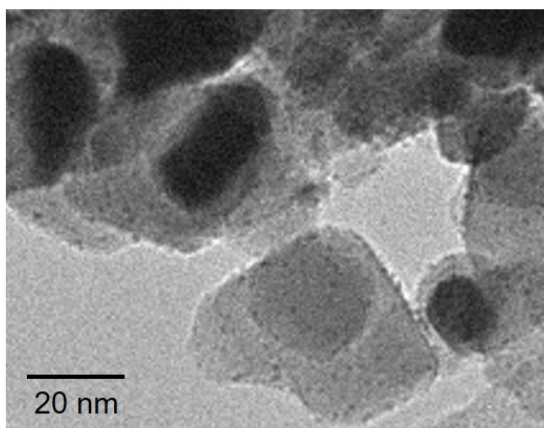

(b) Ru/TiO<sub>2</sub>

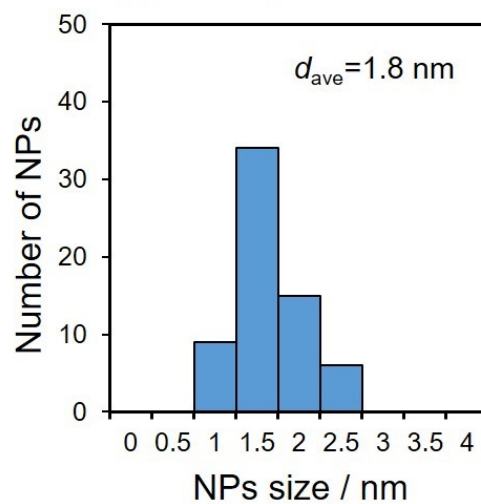

(c) RuNi/TiO<sub>2</sub>

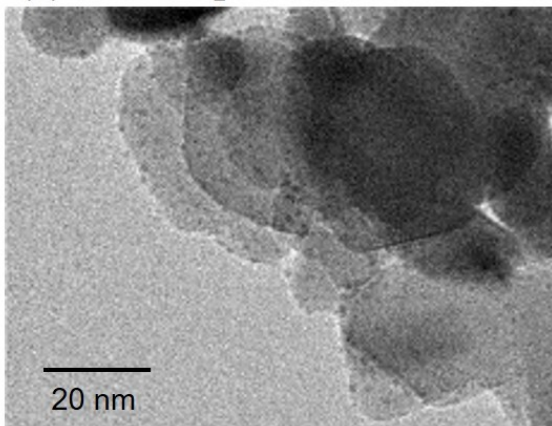

(d) RuNi/TiO<sub>2</sub>

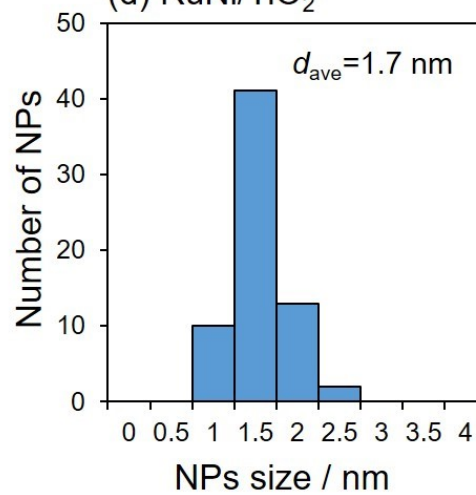

**Fig. S3.** TEM images and size distributions of metal NPs supported on TiO<sub>2</sub>.

(a) Ru/WO<sub>3</sub>

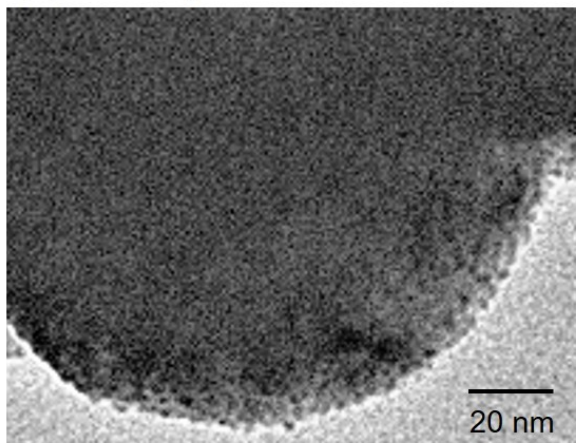

(b) Ru/WO<sub>3</sub>

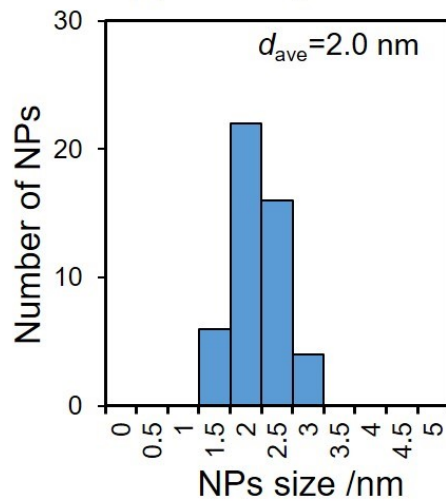

(c) RuNi/WO<sub>3</sub>

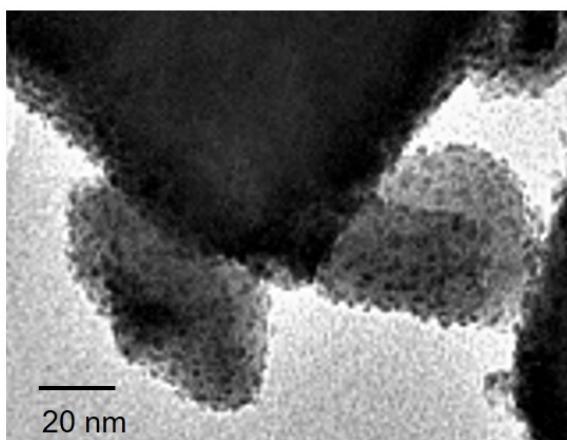

(d) RuNi/WO<sub>3</sub>

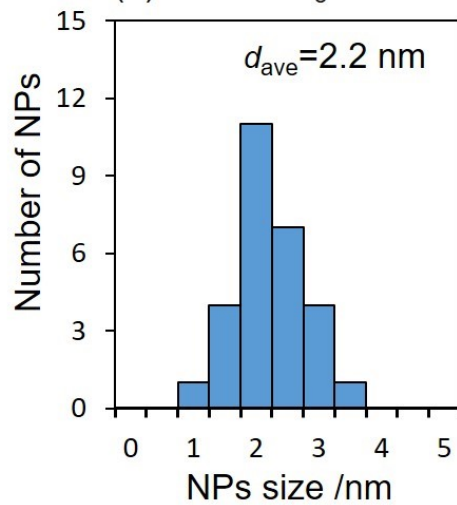

**Fig. S4.** TEM images and size distributions of metal NPs supported on WO<sub>3</sub>.

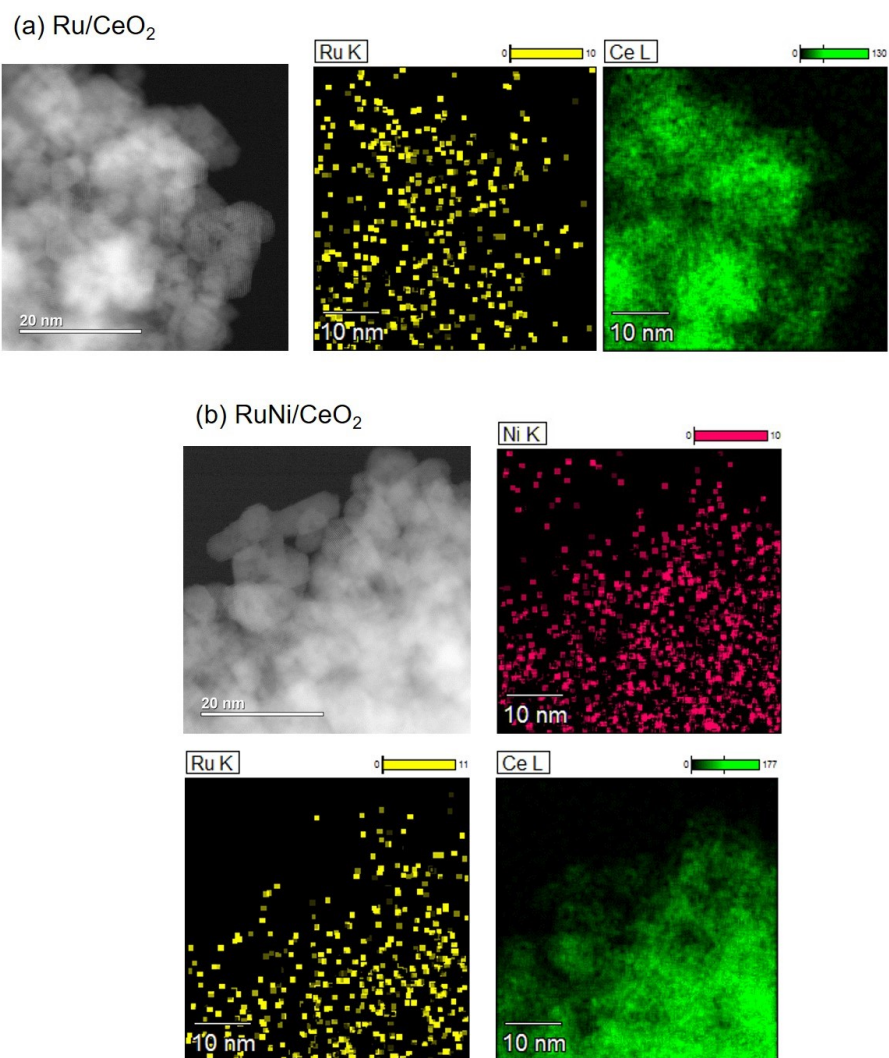

**Fig. S5.** HAADF-STEM images and elemental mapping of (a) Ru/CeO<sub>2</sub> and (b) RuNi/CeO<sub>2</sub>.

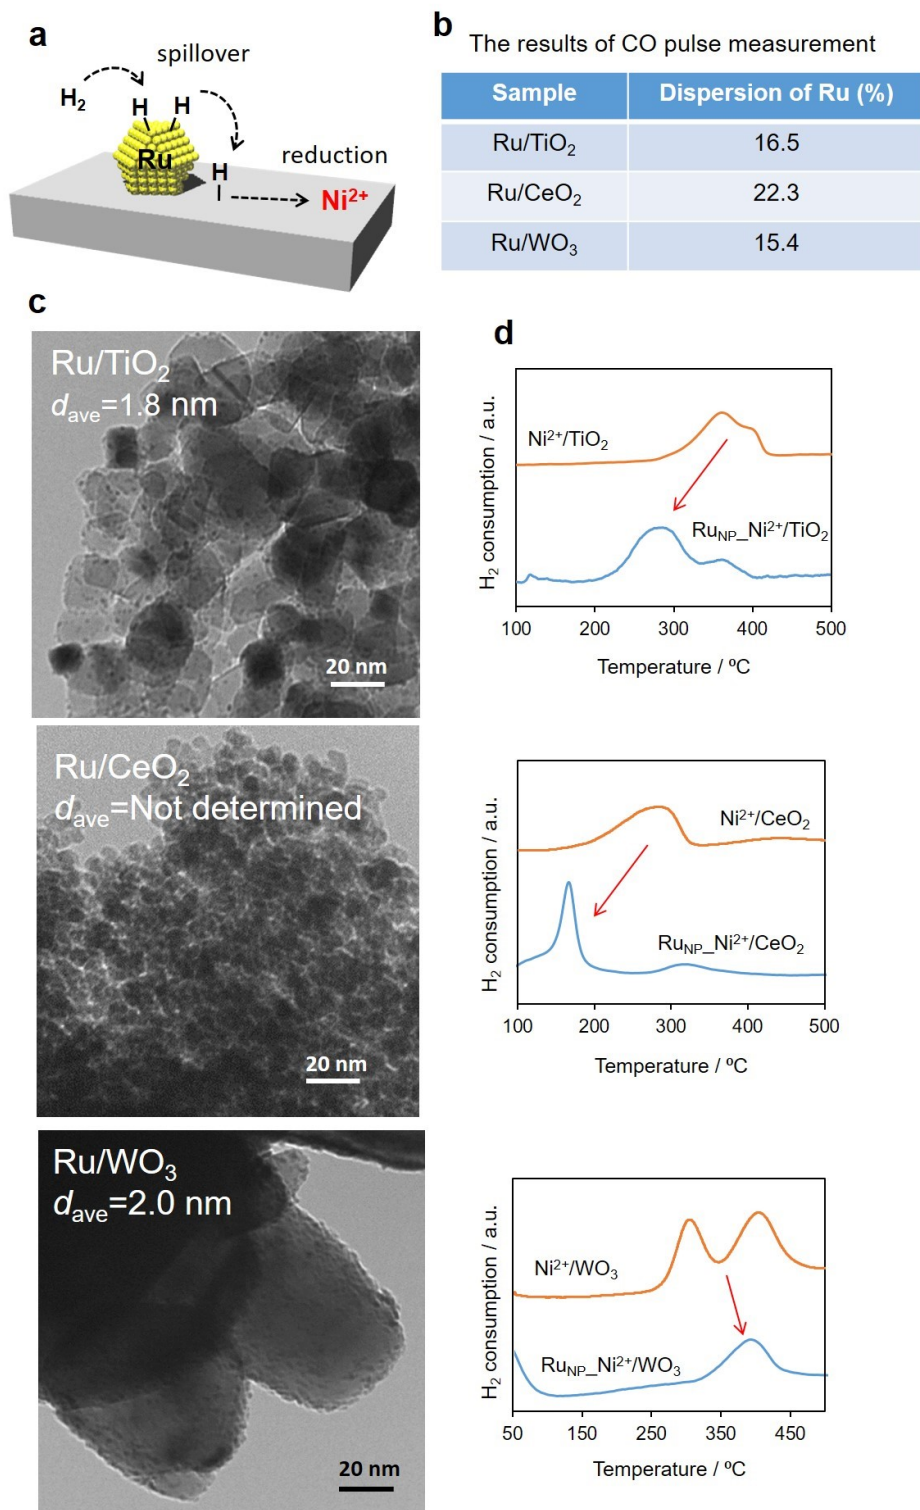

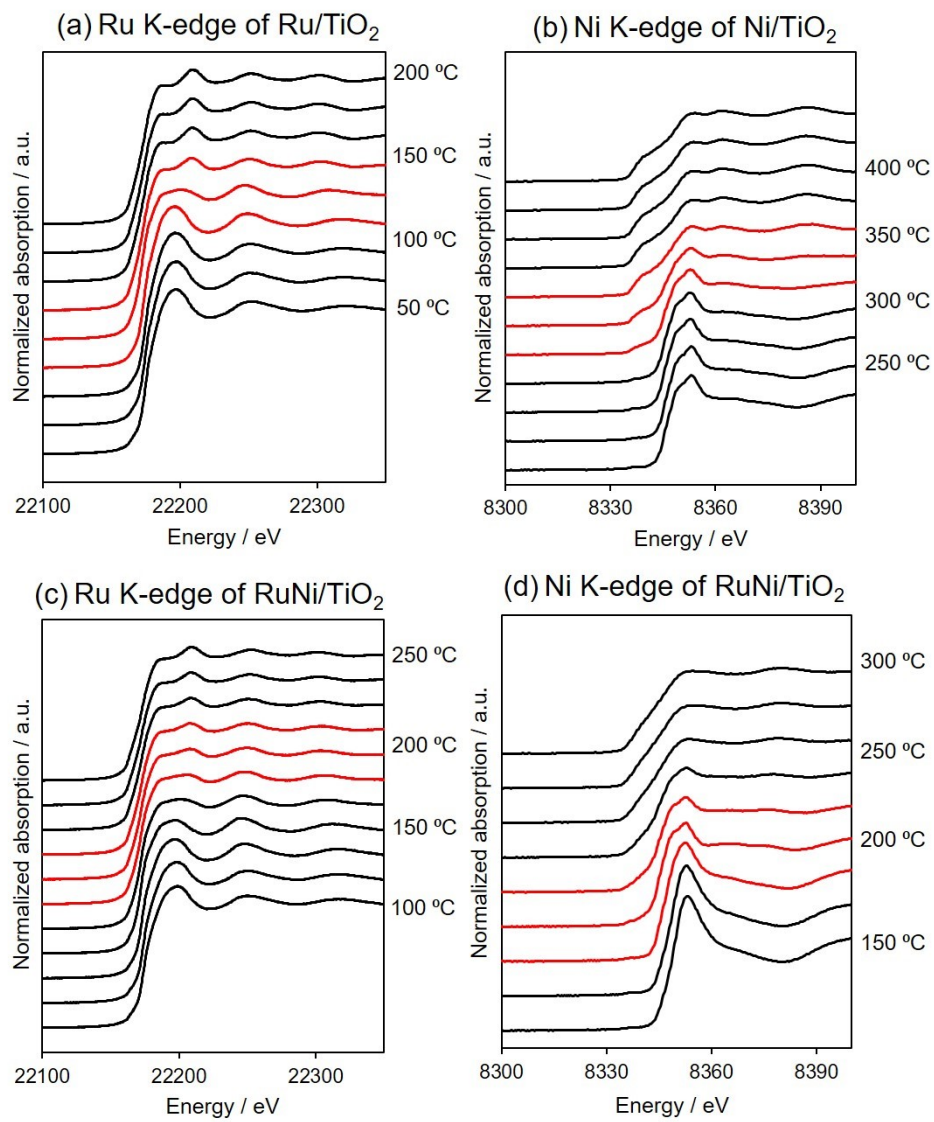

**Fig. S7.** Ru K-edge XANES spectra of (a) Ru/TiO<sub>2</sub> and (c) RuNi/TiO<sub>2</sub> and Ni K-edge XANES spectra of (b) Ni/TiO<sub>2</sub> and (d) RuNi/TiO<sub>2</sub>.



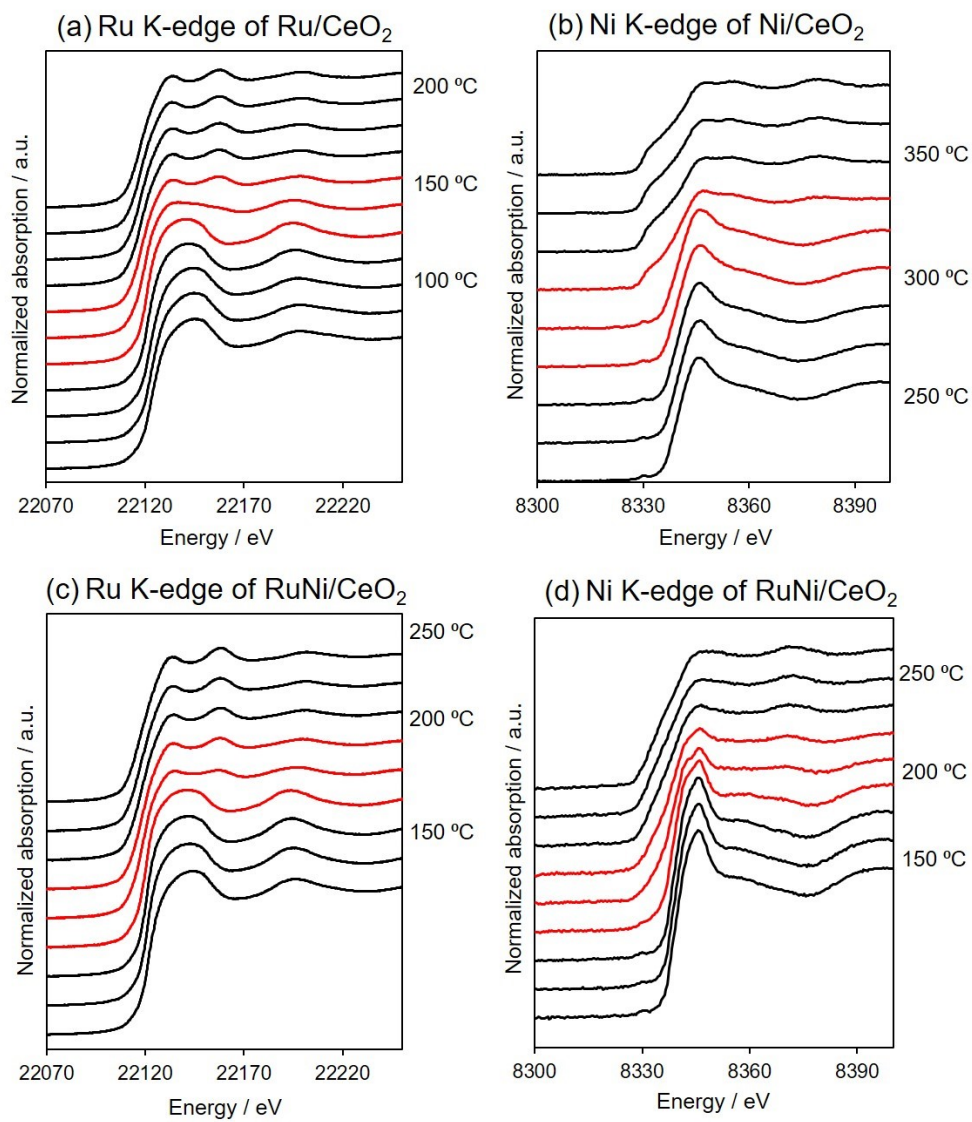

**Fig. S8** Ru K-edge XANES spectra of (a) Ru/CeO<sub>2</sub> and (c) RuNi/CeO<sub>2</sub> and Ni K-edge XANES spectra of (b) Ni/CeO<sub>2</sub> and (d) RuNi/CeO<sub>2</sub>.

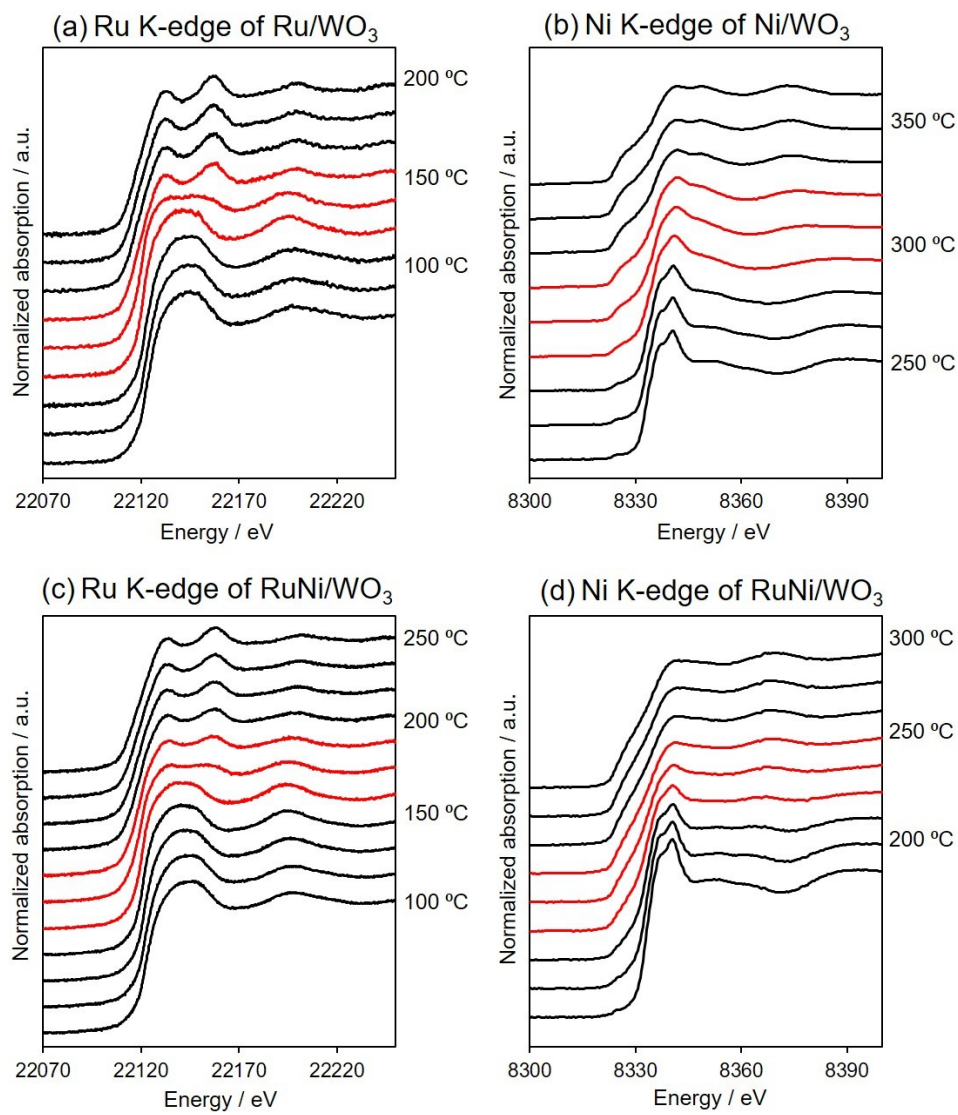

**Fig. S9** Ru K-edge XANES spectra of (a) Ru/WO<sub>3</sub>, (c) RuNi/WO<sub>3</sub>, and Ni K-edge XANES spectra of (b) Ni/WO<sub>3</sub> and (d) RuNi/WO<sub>3</sub>.

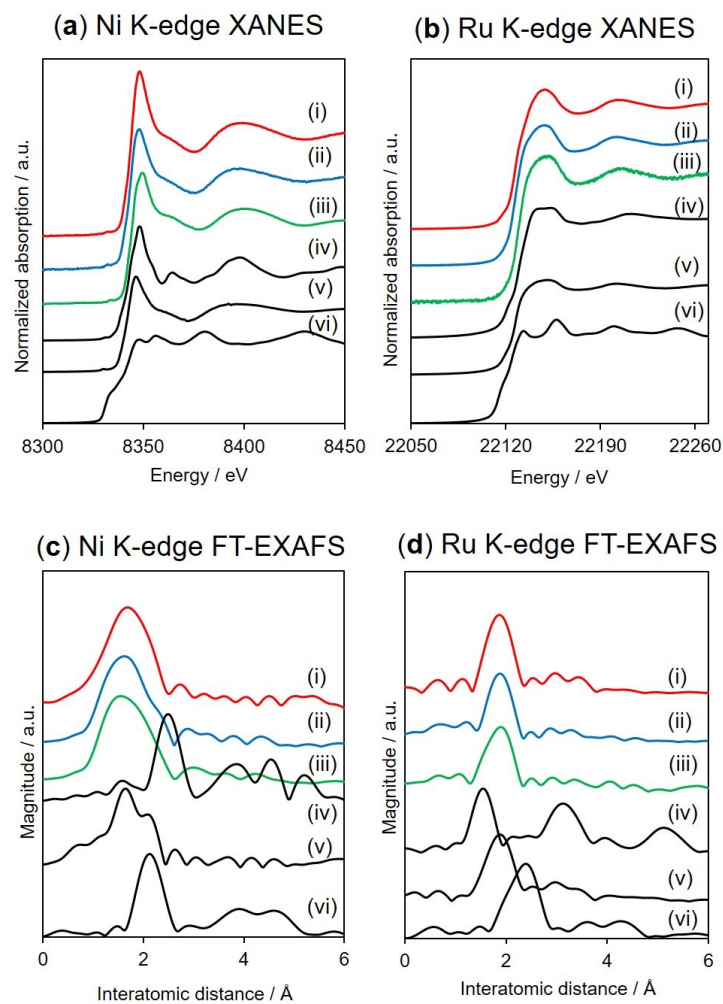

**Fig. S10** Ni K-edge (a) XANES and (c) FT-EXAFS spectra of as deposited (i) RuNi/TiO<sub>2</sub>, (ii) RuNi/CeO<sub>2</sub>, (iii) RuNi/WO<sub>3</sub>, and reference samples (iv) NiO, (v) NiCl<sub>2</sub>, and (vi) Ni foil. Ru K-edge (b) XANES and (d) FT-EXAFS spectra of as deposited (i) RuNi/TiO<sub>2</sub>, (ii) RuNi/CeO<sub>2</sub>, (iii) RuNi/WO<sub>3</sub>, and reference samples (iv) RuO<sub>2</sub>, (v) RuCl<sub>3</sub>, and (vi) Ru foil.

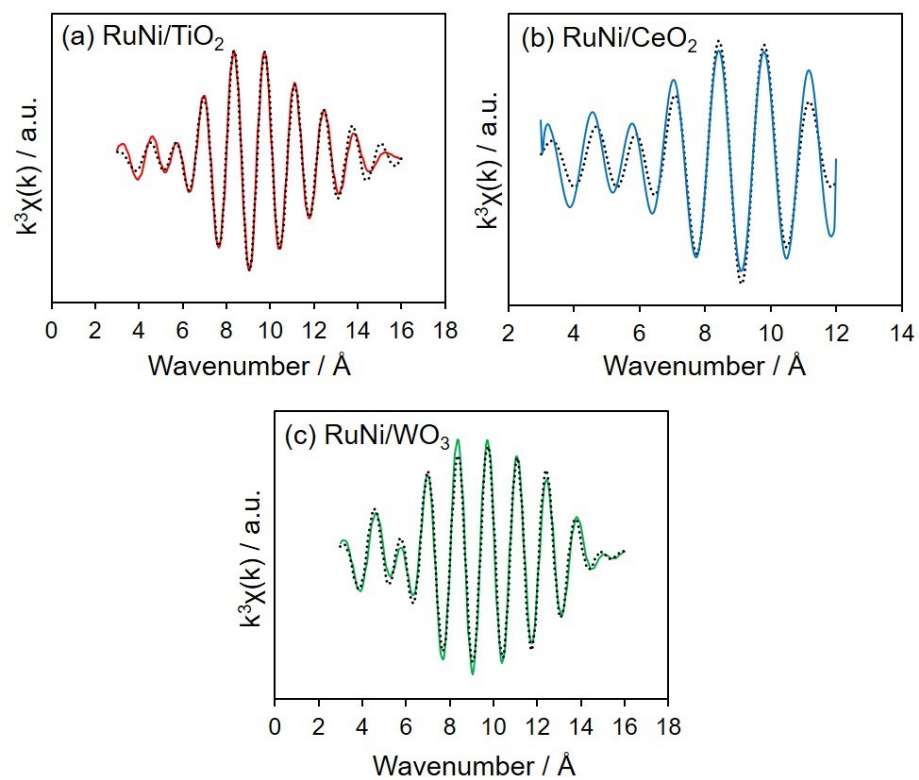

**Fig. S11** Inverse-FT of Ru K-edge  $k^3$ -weighted EXAFS (black dot) and Curve-fitting result for (a) RuNi/TiO<sub>2</sub>, (b) RuNi/CeO<sub>2</sub>, and (c) RuNi/WO<sub>3</sub>.

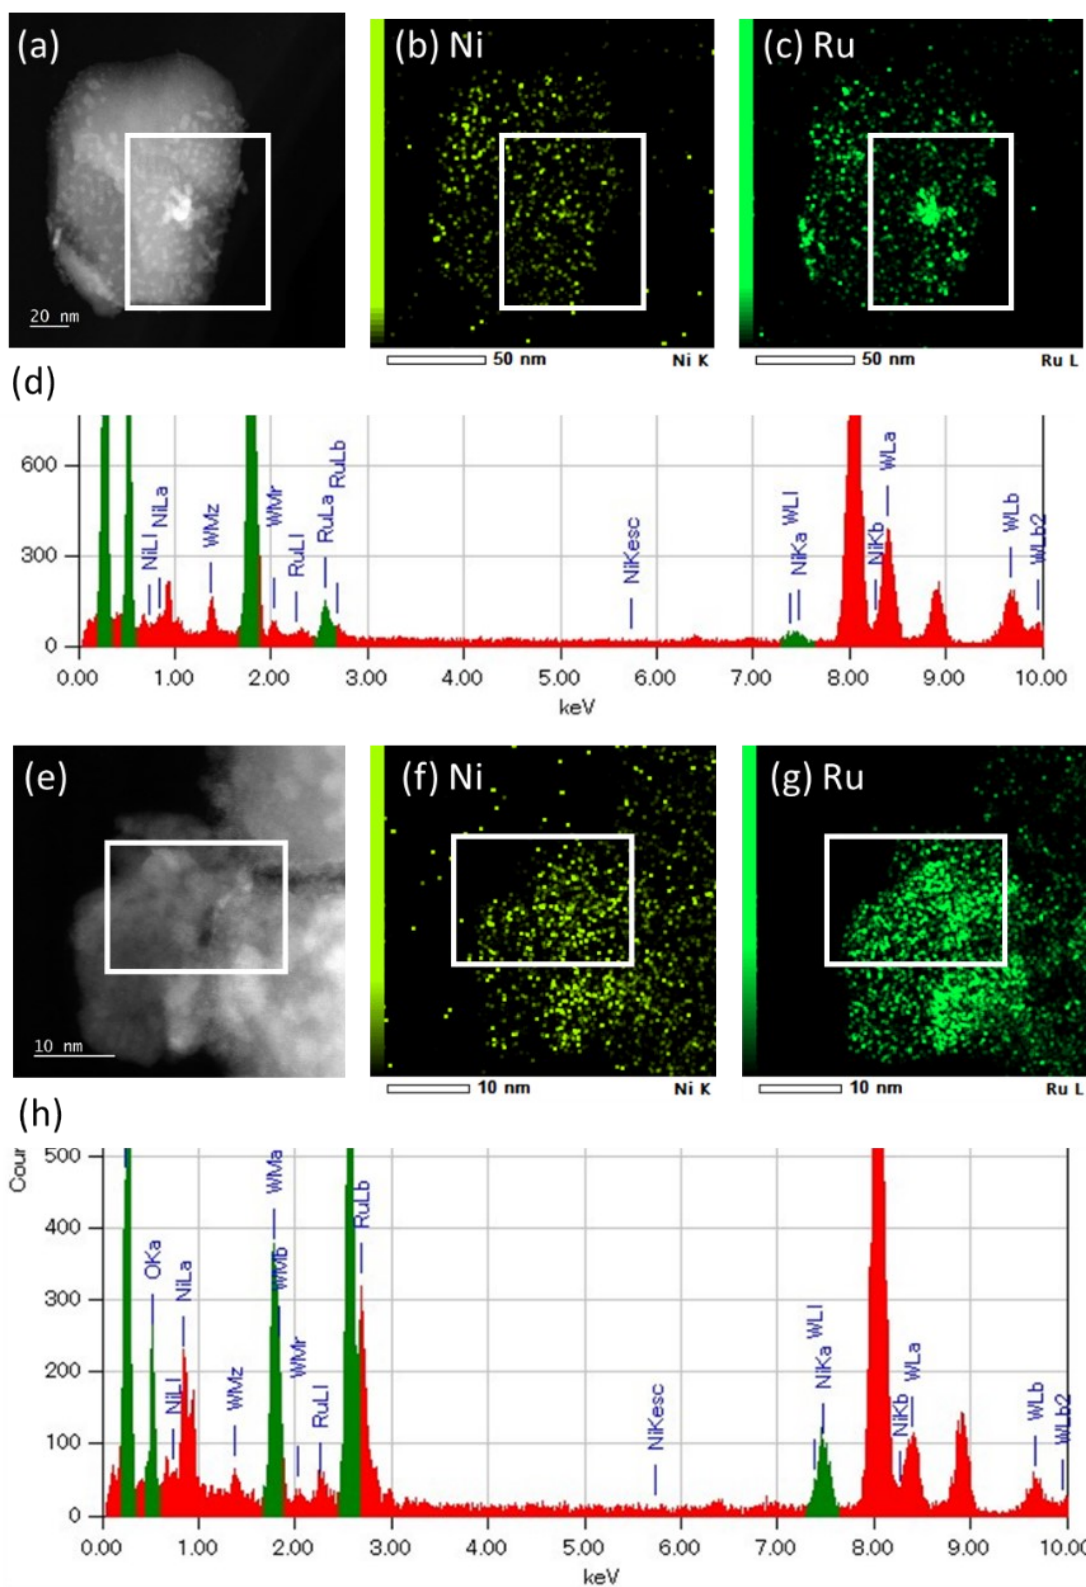

**Fig. S12.** HAADF-STEM images (a and e) and elemental mapping of RuNi/WO<sub>3</sub> of Ru (b and f), Ni (c and g), and EDX analysis (d and h) in the indicated region.

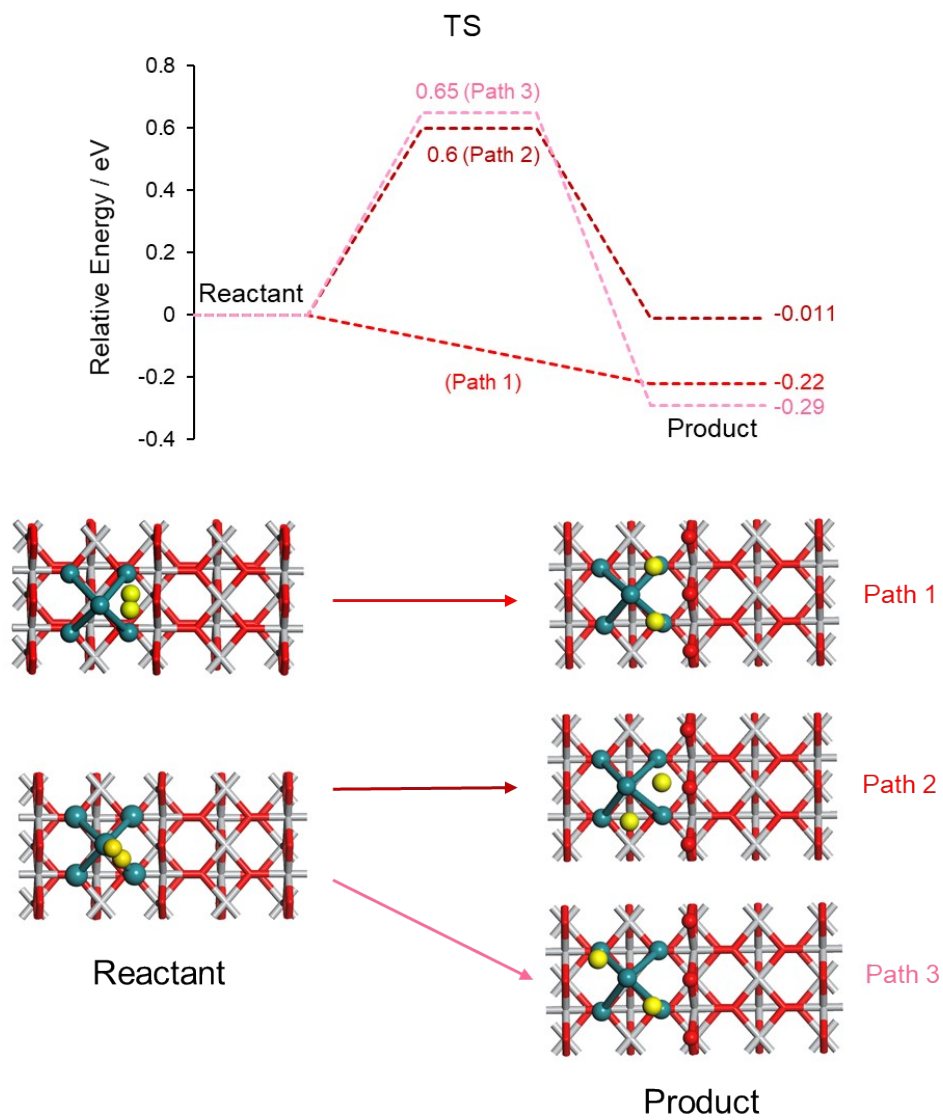

**Fig. S13.** Energy profiles and calculated model for H<sub>2</sub> cleavage on Ru<sub>5</sub>(homolytic) (Step 1) on TiO<sub>2</sub>(110). Green ball (Ru), yellow ball (H), red stick (O), and gray stick (Ti).

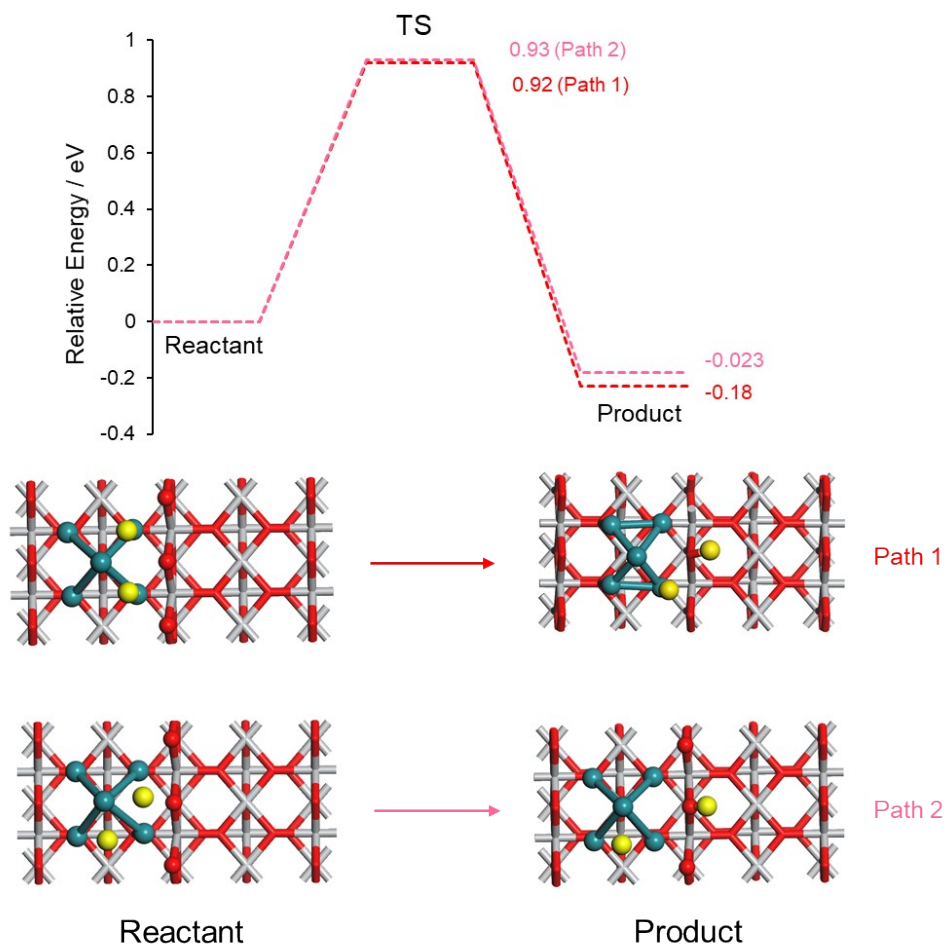

**Fig. S14.** Energy profiles and calculated model for H atom transfer from Ru<sub>5</sub> to oxide (Step 2) on TiO<sub>2</sub>(110). Green ball (Ru), yellow ball (H), red stick (O), and gray stick (Ti).

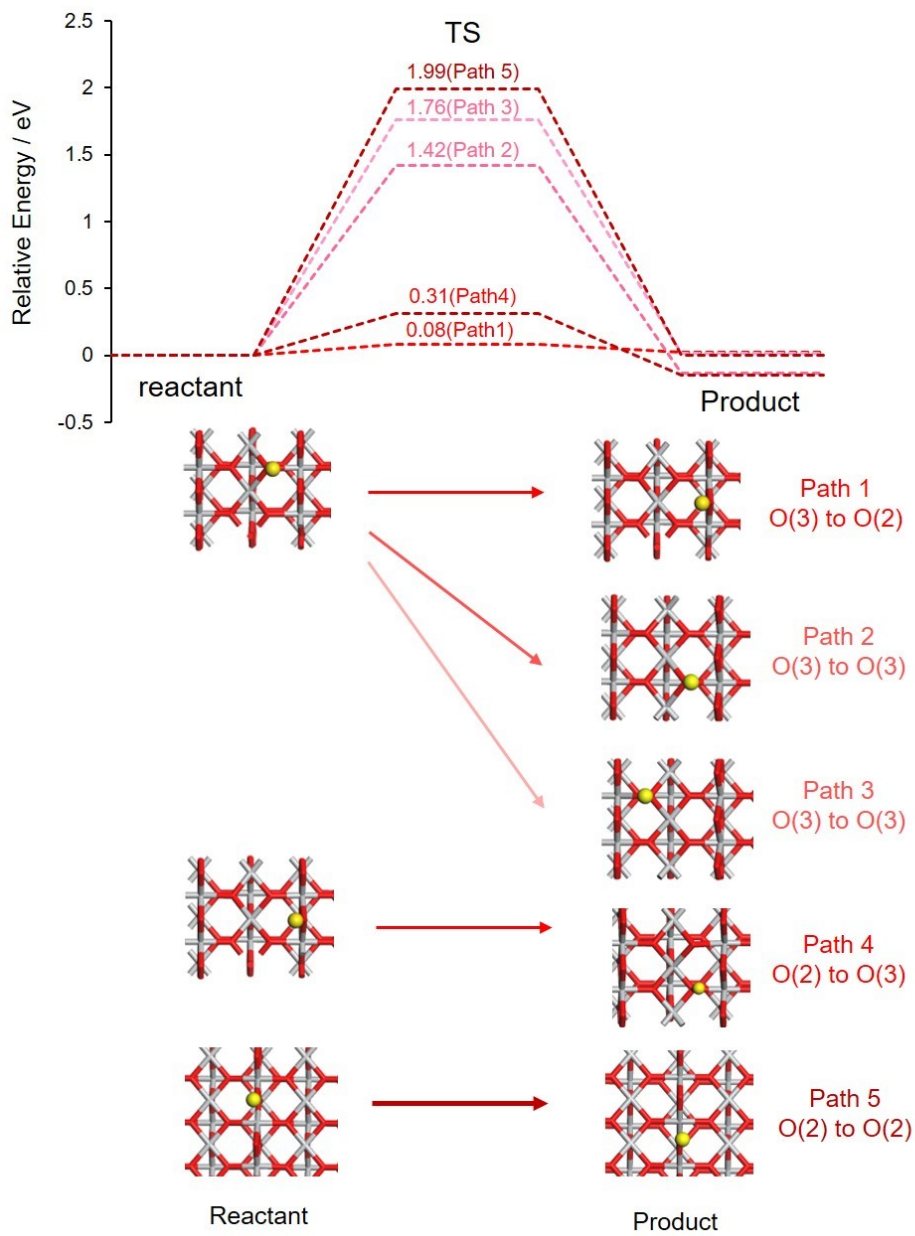

**Fig. S15.** Energy profiles and calculated models for H atom migration (Step 3) on TiO<sub>2</sub>(110). Yellow ball (H), red stick (O), and gray stick (Ti).



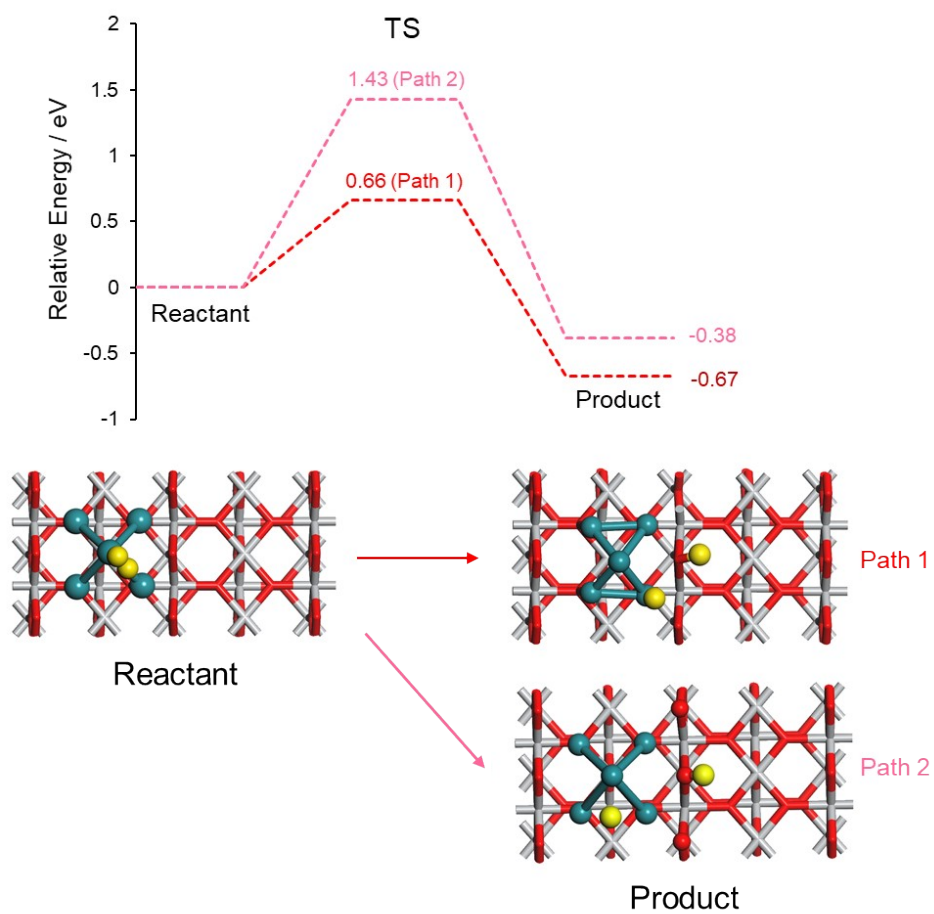

**Fig. S16.** Energy profiles and calculated model for H<sub>2</sub> cleavage on Ru<sub>5</sub> and oxide (heterolytic) (Step 1') on TiO<sub>2</sub>(110). Green ball (Ru), yellow ball (H), red stick (O), and gray stick (Ti).

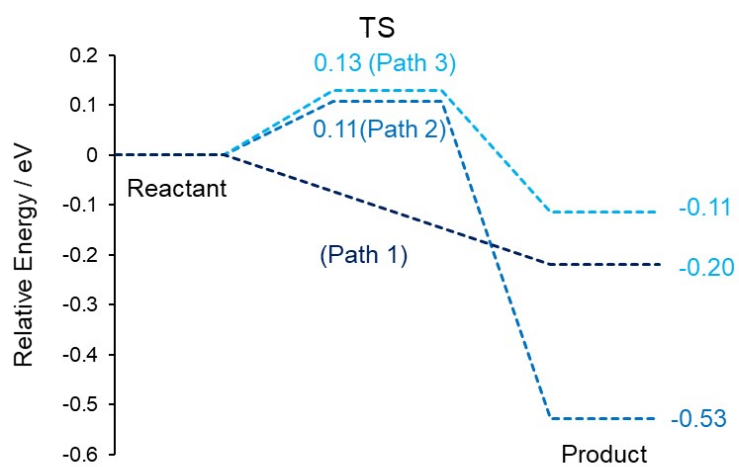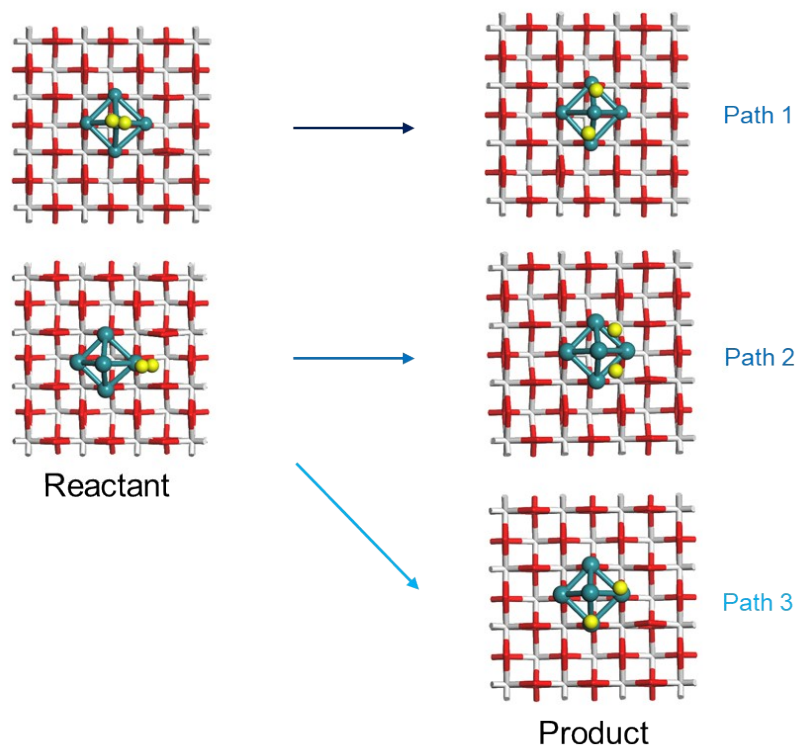

**Fig. S17.** Energy profiles and calculated model the H<sub>2</sub> cleavage on Ru<sub>5</sub>(homolytic) (Step 1) on CeO<sub>2</sub>(100). Green ball (Ru), yellow ball (H), red stick (O), and white stick (Ce)

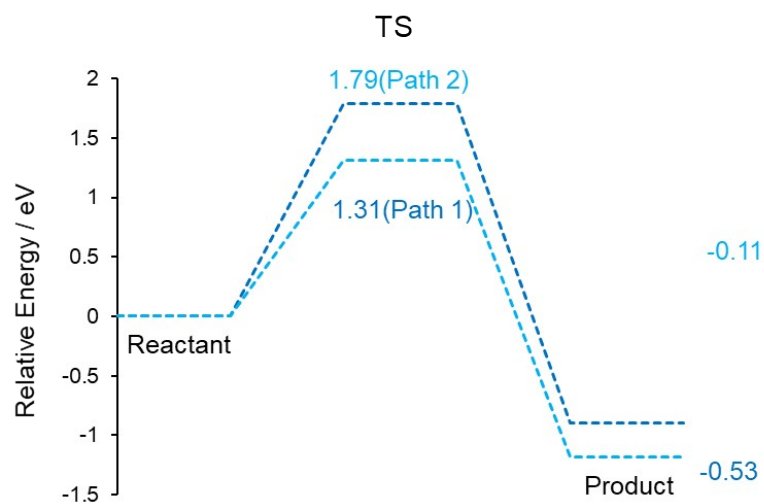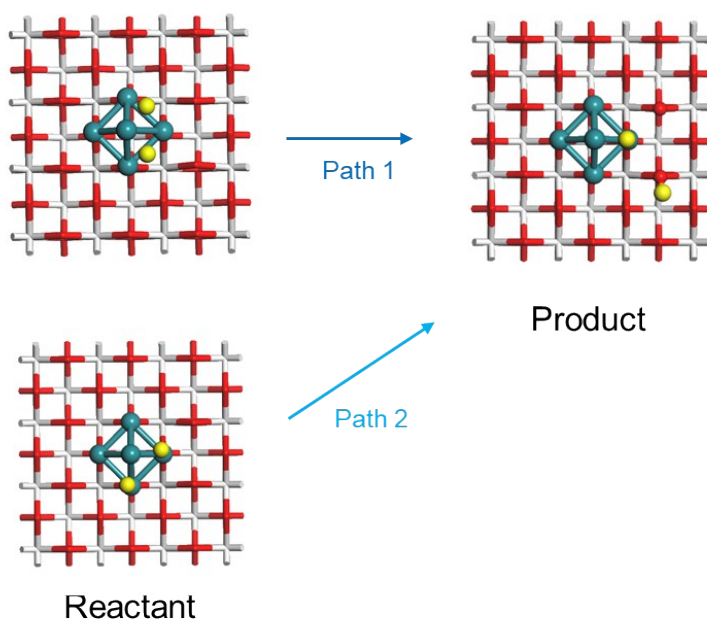

**Fig. S18.** Energy profiles and calculated model for H atom transfer from Ru<sub>5</sub> to oxide (Step 2) on CeO<sub>2</sub>(100). Green ball (Ru), yellow ball (H), red stick (O), and white stick (Ce)

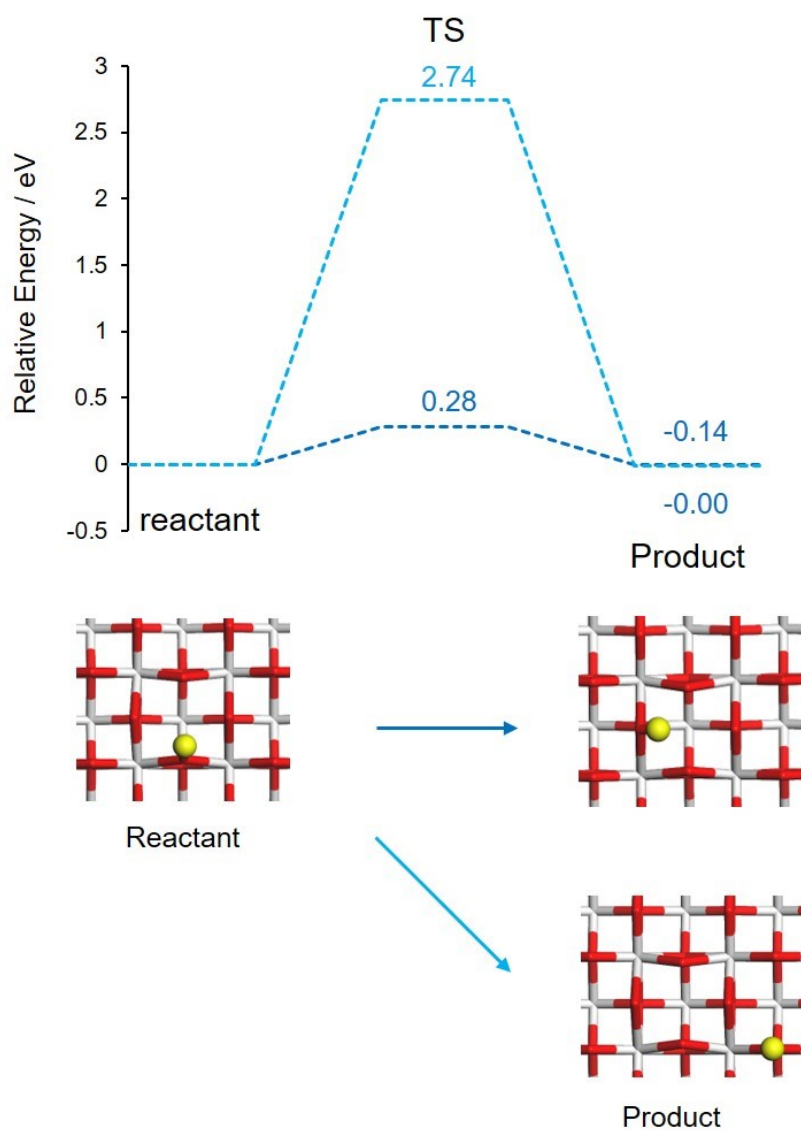

**Fig. S19.** Energy profiles and calculated models for e H atom migration (Step 3) on CeO<sub>2</sub>(001). Yellow ball (H), red stick (O), and white stick (Ce).

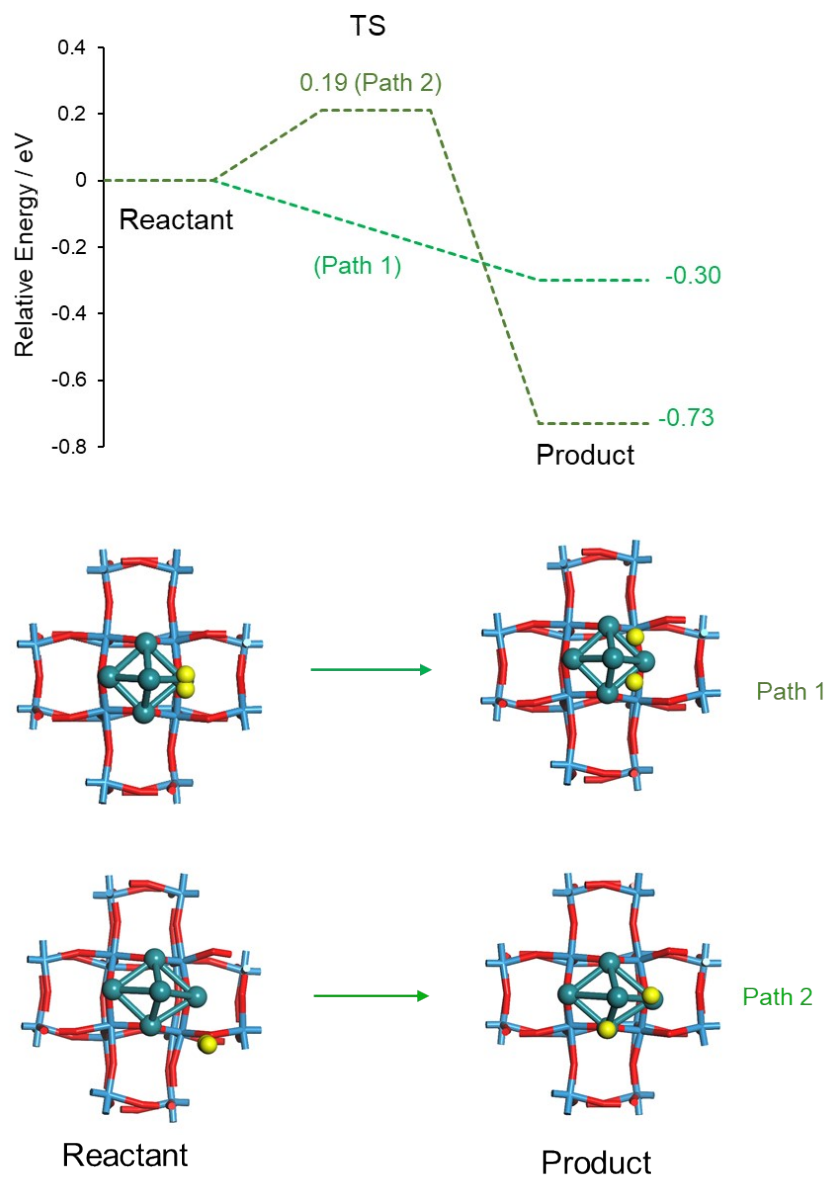

**Fig. S20.** Energy profiles and calculated model for H<sub>2</sub> cleavage on Ru<sub>5</sub>(homolytic) (Step 1) on WO<sub>3</sub> (001). Green ball (Ru), yellow ball (H), red stick (O), and blue stick (W).

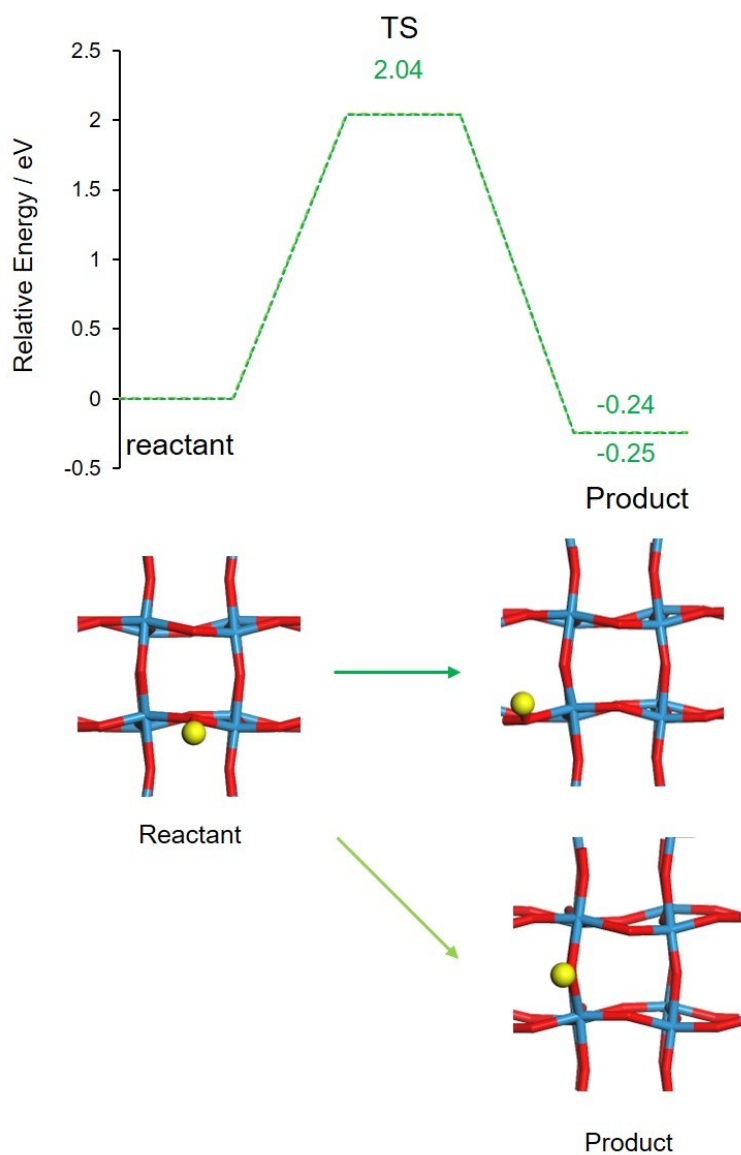

**Fig. S21.** Energy profiles and calculated models for H atom migration (Step 3) on WO<sub>3</sub>(001). Yellow ball (H), red stick (O), and blue stick (W).

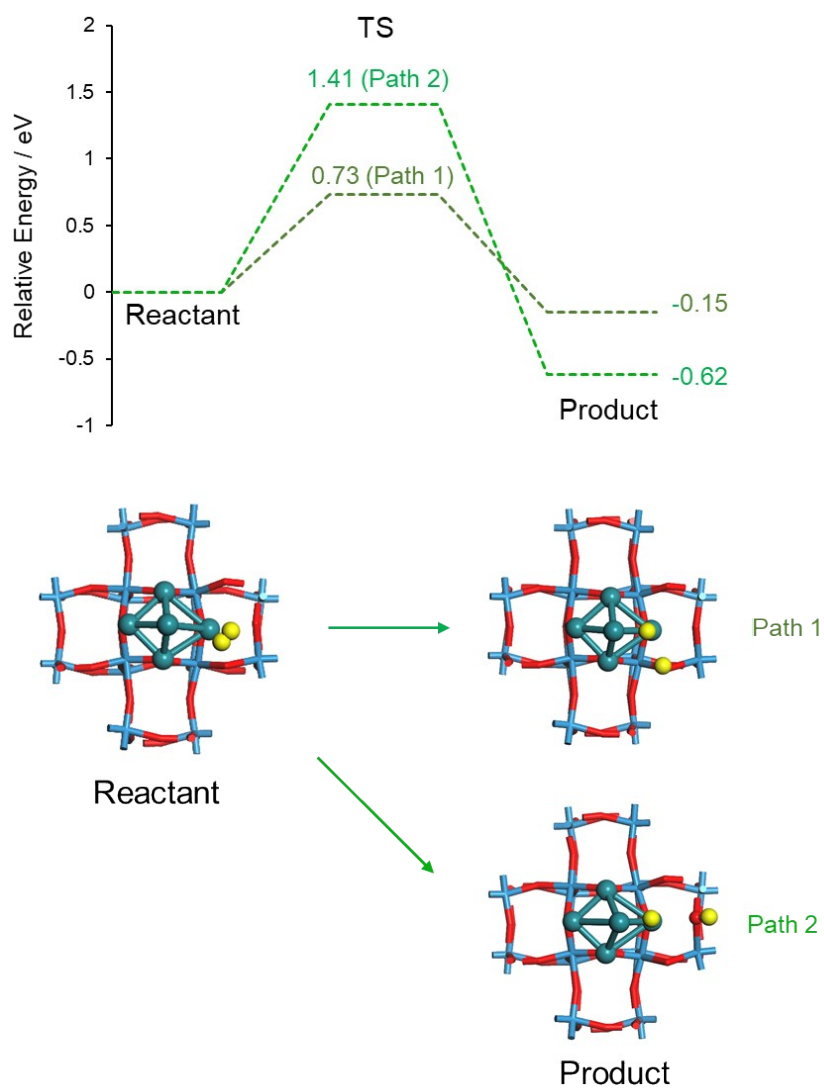

**Fig. S22.** Energy profiles and calculated model for H<sub>2</sub> cleavage on Ru<sub>5</sub> and oxide (heterolytic) (Step 1') on WO<sub>3</sub>(001). Green ball (Ru), yellow ball (H), red stick (O), and blue stick (W).

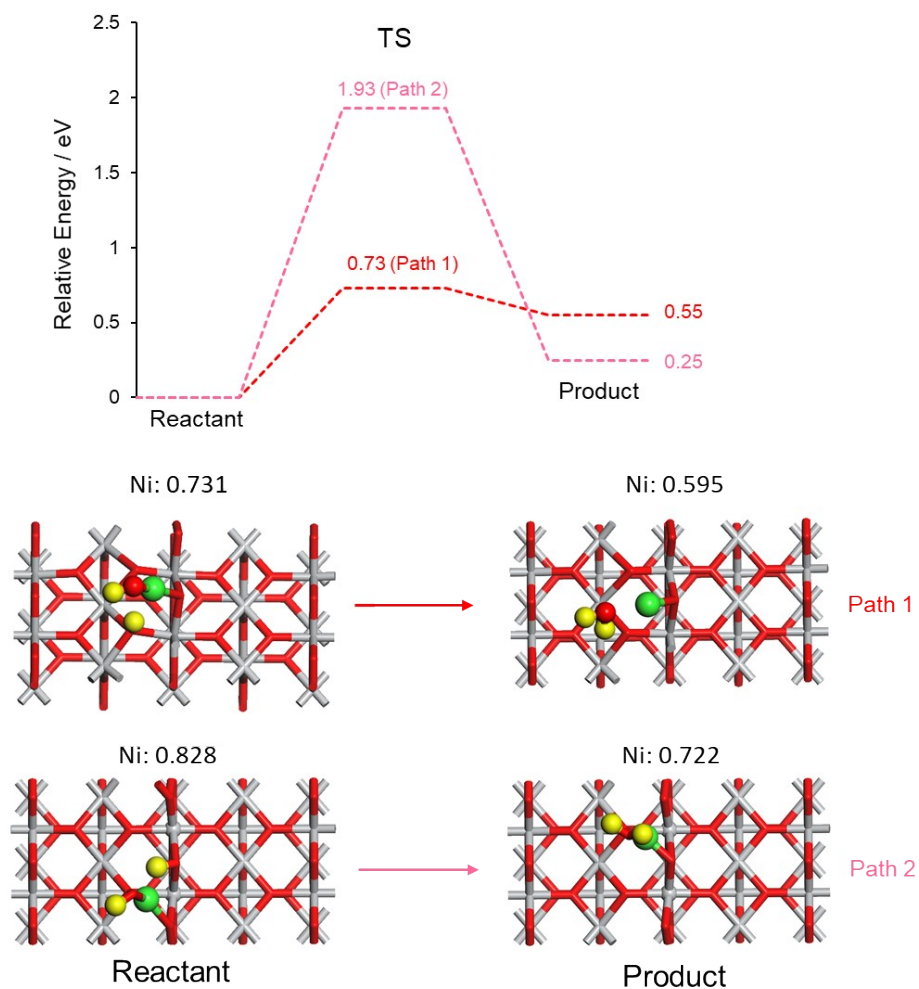

**Fig. S23.** Energy profiles and calculated model for reduction of Ni<sup>2+</sup> by spilled H (Langmuir–Hinshelwood mechanism) (Step 4) on TiO<sub>2</sub>(110). The values in the models are Mulliken atomic charges of Ni atom as determined by DFT calculations. Pale green ball (Ni), yellow ball (H), red stick (O), and gray stick (Ti)



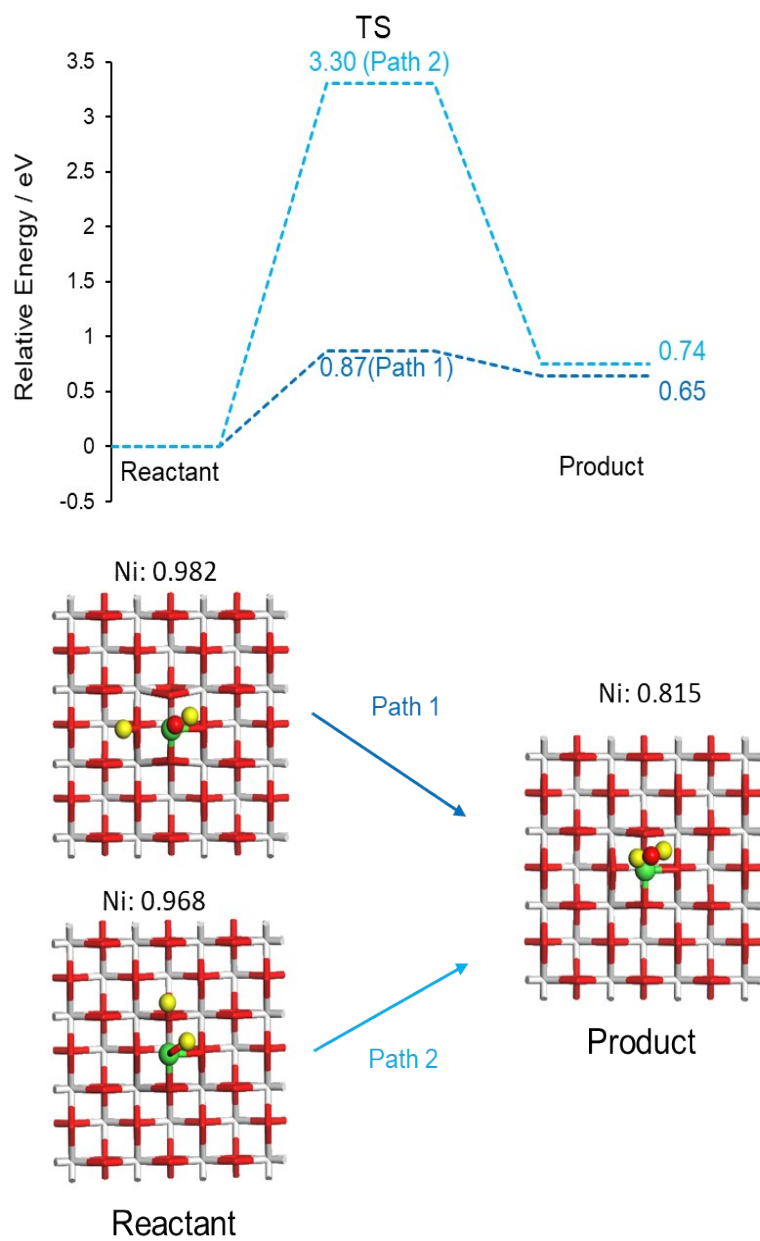

**Fig. S24.** Energy profiles and calculated model for reduction of  $\text{Ni}^{n+}$  by spilled H (Langmuir–Hinshelwood mechanism) (Step 4) on  $\text{CeO}_2(001)$ . The values in the models are Mulliken atomic charges of Ni atom as determined by DFT calculations. Pale green ball (Ni), yellow ball (H), red stick (O), and white stick (Ce)

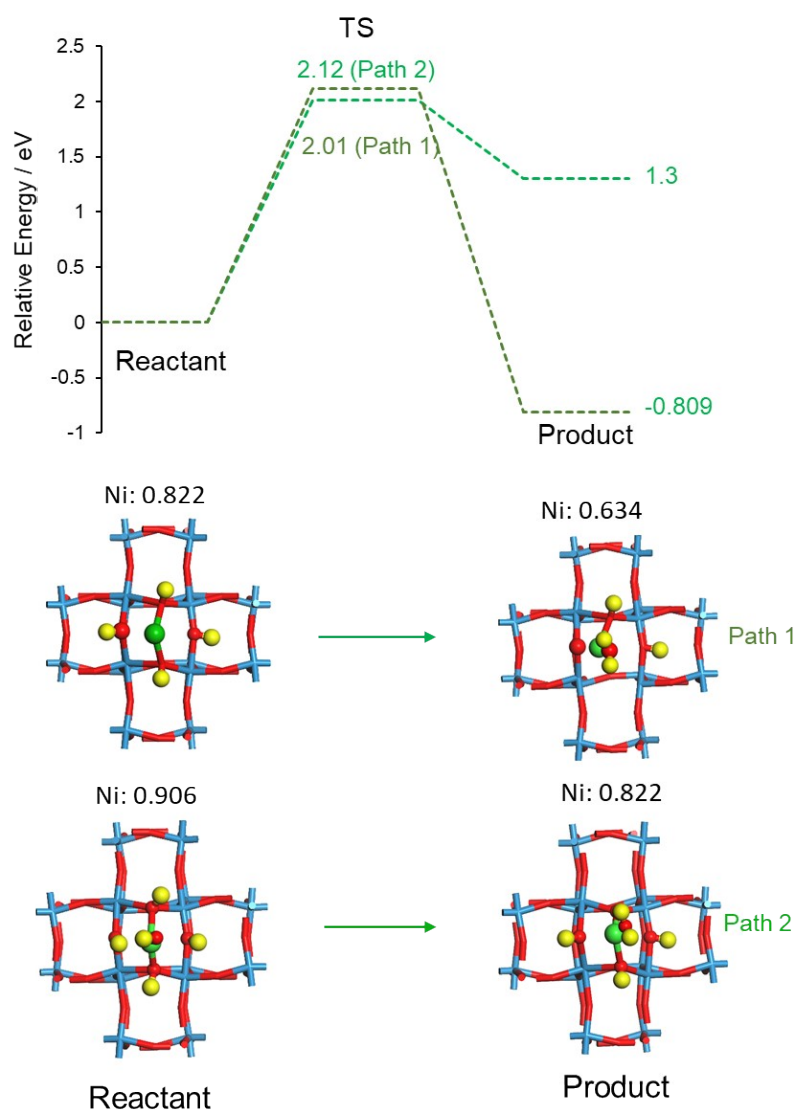

**Fig. S25.** Energy profiles and calculated model for reduction of Ni<sup>+</sup> by spilled H (Langmuir–Hinshelwood mechanism) (Step 4) on WO<sub>3</sub>(001). The values in the models are Mulliken atomic charges of Ni atom as determined by DFT calculations. Pale green ball (Ni), yellow ball (H), red stick (O), and blue stick (W)

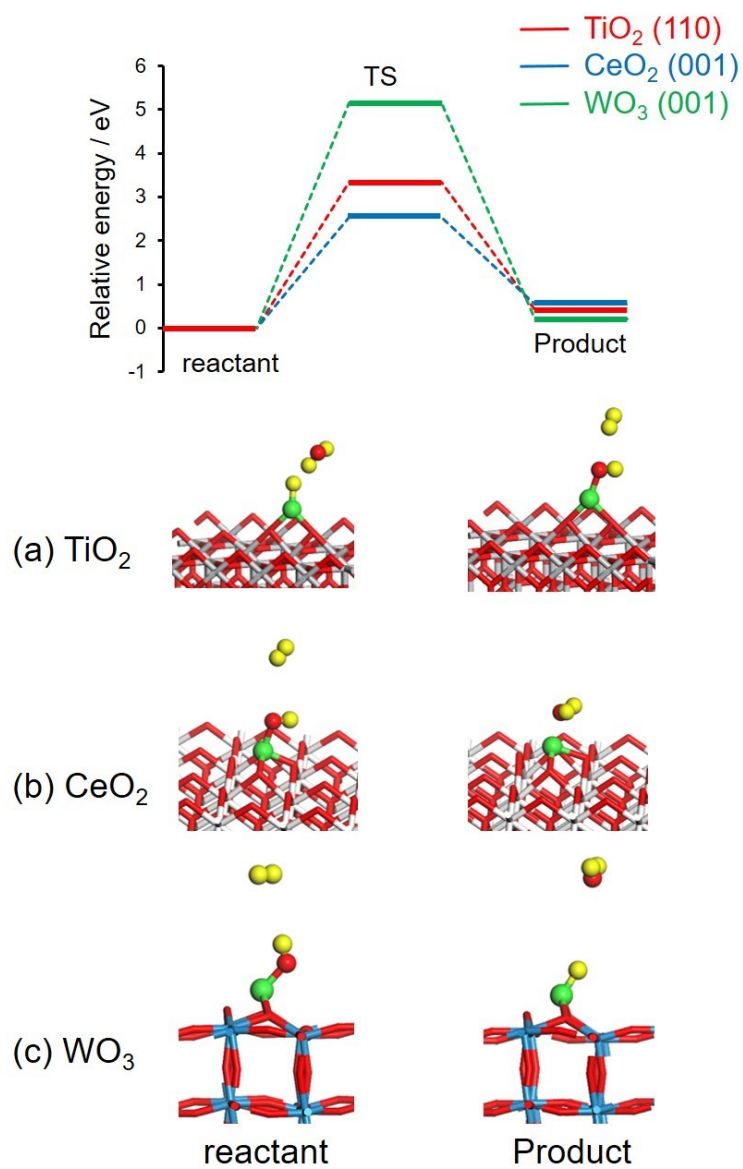

**Fig. S26.** Energy profiles and calculated models for reduction of Ni<sup>2+</sup> species by vapor H<sub>2</sub> (Eley–Rideal mechanisms) on (a) TiO<sub>2</sub> (110), (b) CeO<sub>2</sub> (001), and (c) WO<sub>3</sub> (001).

**Table S1.** Comparison of binding energy of Ru<sub>5</sub> cluster and Ni atom on TiO<sub>2</sub> (110), CeO<sub>2</sub> (001), and WO<sub>3</sub>(001).

| model | Sample           | metal | Binding Energy (eV) <sup>a</sup> |
|-------|------------------|-------|----------------------------------|
| a     | TiO <sub>2</sub> | Ni    | 3.71                             |
| b     | TiO <sub>2</sub> | Ni    | 3.71                             |
| c     | TiO <sub>2</sub> | Ni    | 3.72                             |
| d     | CeO <sub>2</sub> | Ni    | 4.86                             |
| e     | CeO <sub>2</sub> | Ni    | 4.86                             |
| f     | WO <sub>3</sub>  | Ni    | 2.42                             |
| g     | WO <sub>3</sub>  | Ni    | 2.42                             |

<sup>a</sup> Binding energy was defined by the equation  $E_{\text{metal}} + E_{\text{support}} - E_{\text{metal/support}}$ .

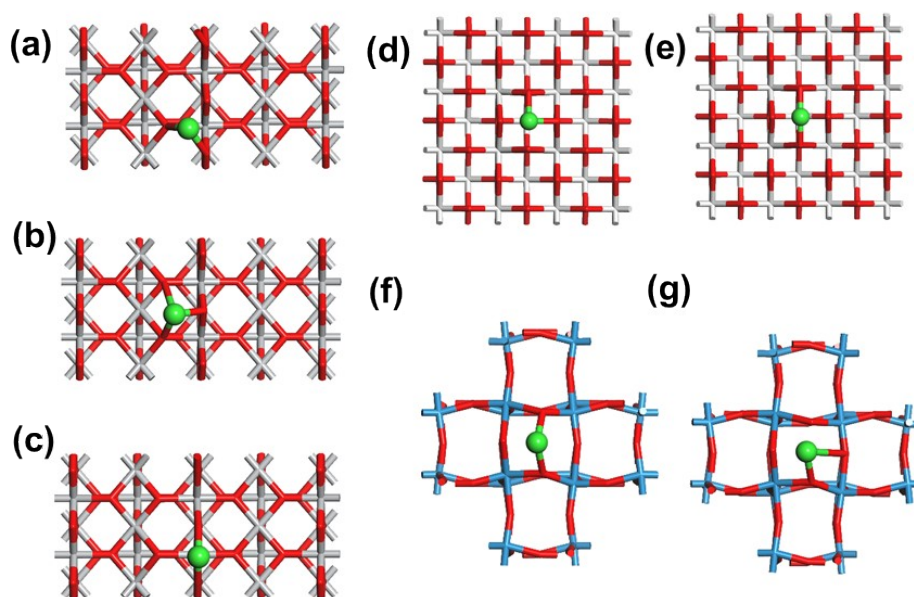

**Fig. S27.** Calculated model for rutile TiO<sub>2</sub> (110), CeO<sub>2</sub> (001), and WO<sub>3</sub>(001).

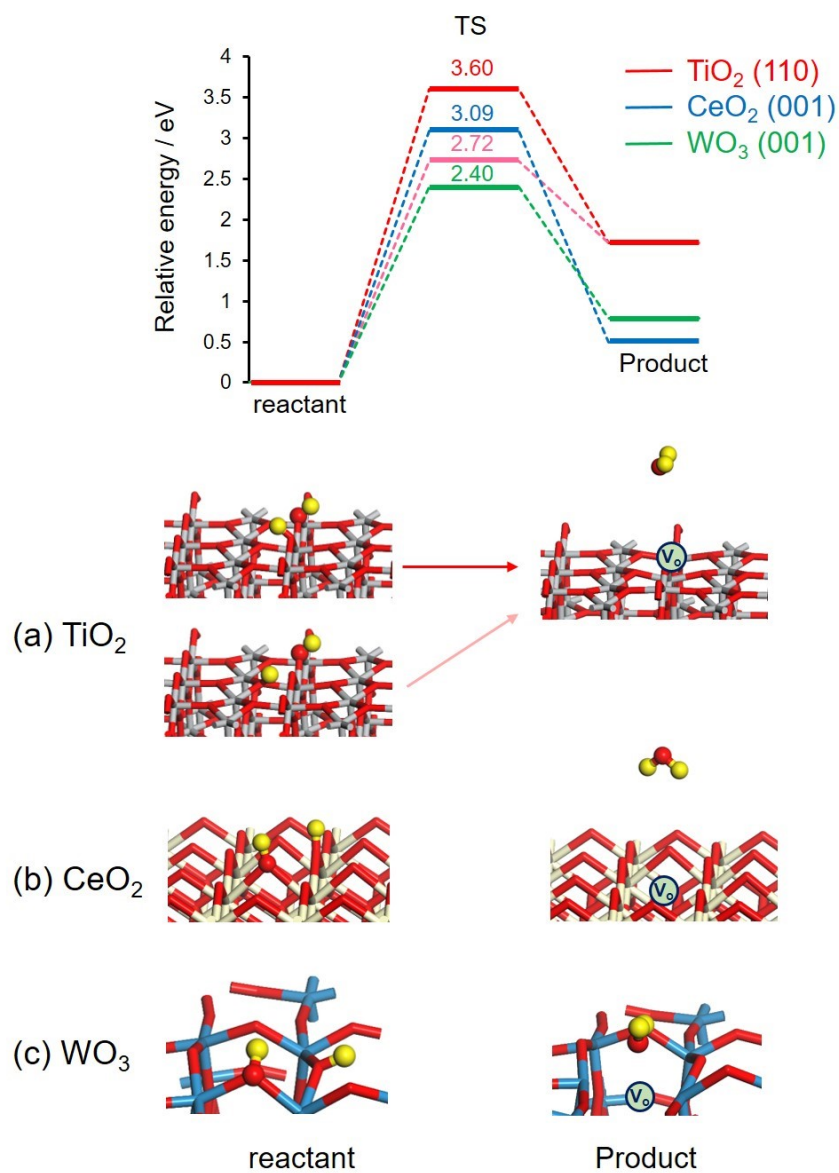

**Fig. S28** Energy profiles and calculated models for removal of lattice oxygen by a spilled H atom to form H<sub>2</sub>O and an oxygen vacancy on (a) TiO<sub>2</sub> (110), (b) CeO<sub>2</sub> (001), and (c) WO<sub>3</sub> (001). Yellow ball (H), red stick (O), gray stick (Ti), white stick (Ce), and blue stick (W).

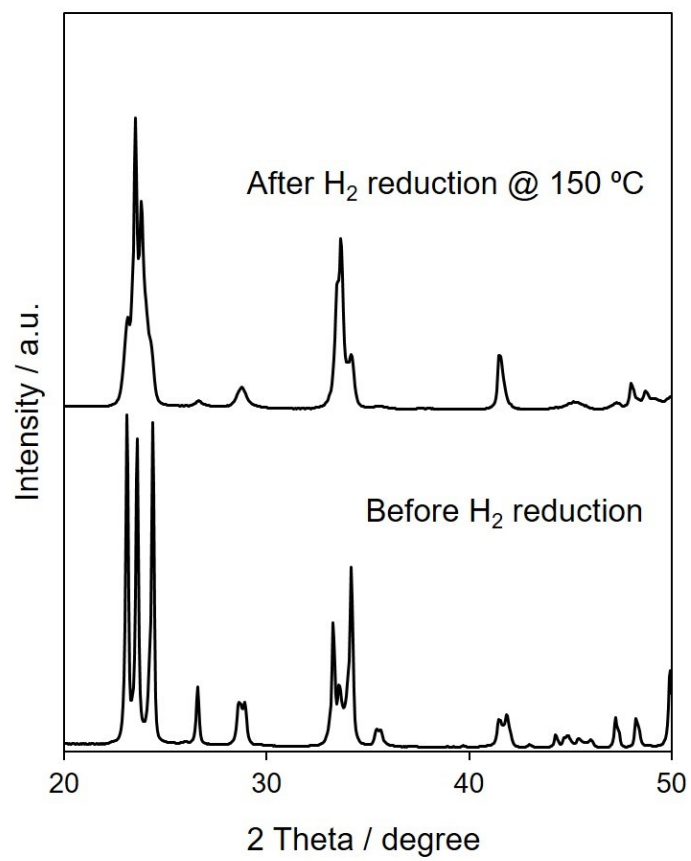

**Fig. S29** XRD patterns of Ru/WO<sub>3</sub> before and after H<sub>2</sub> reduction.

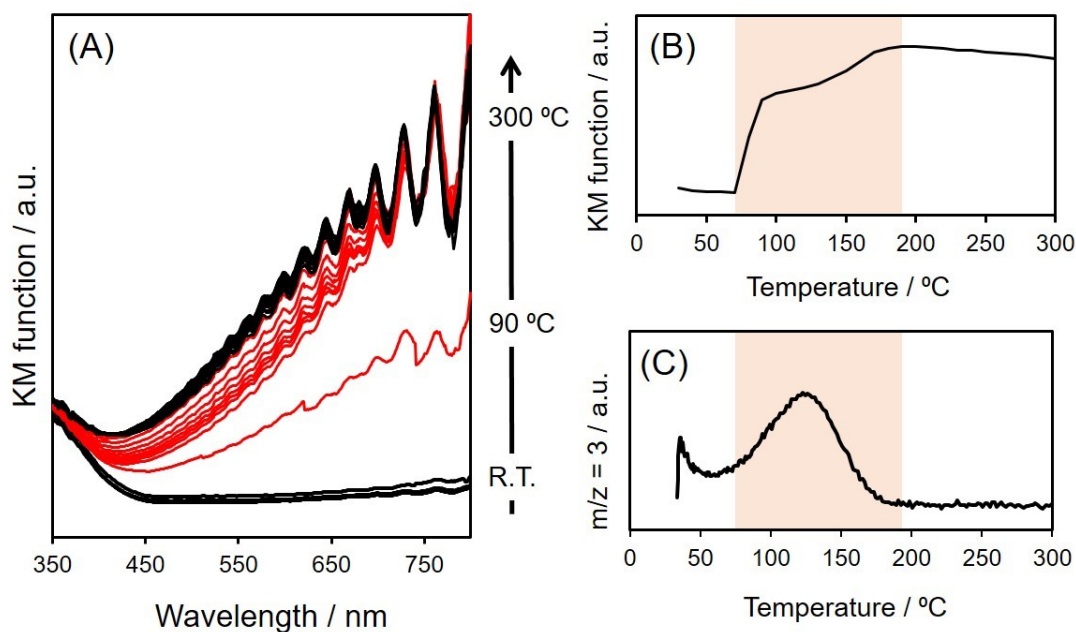

**Fig. S30** (A) The increase of absorption in visible light region of Ru/WO<sub>3</sub> at elevated temperature under H<sub>2</sub> flow measured by *in situ* UV-vis instrument, (B) the plot of intensity of KM function at 600 nm as a function of temperature, (C) HD evolution monitored by mass spectroscopy for Ru/WO<sub>3</sub>. The significant colour change from white to bronze (highlighted range in (B)) is due to the appearance of mixed valence transfer bands between W<sup>6+</sup> and W<sup>5+</sup>. This temperature range is matched well with that of the HD production peaks via H-D exchange (highlighted range in (C)).

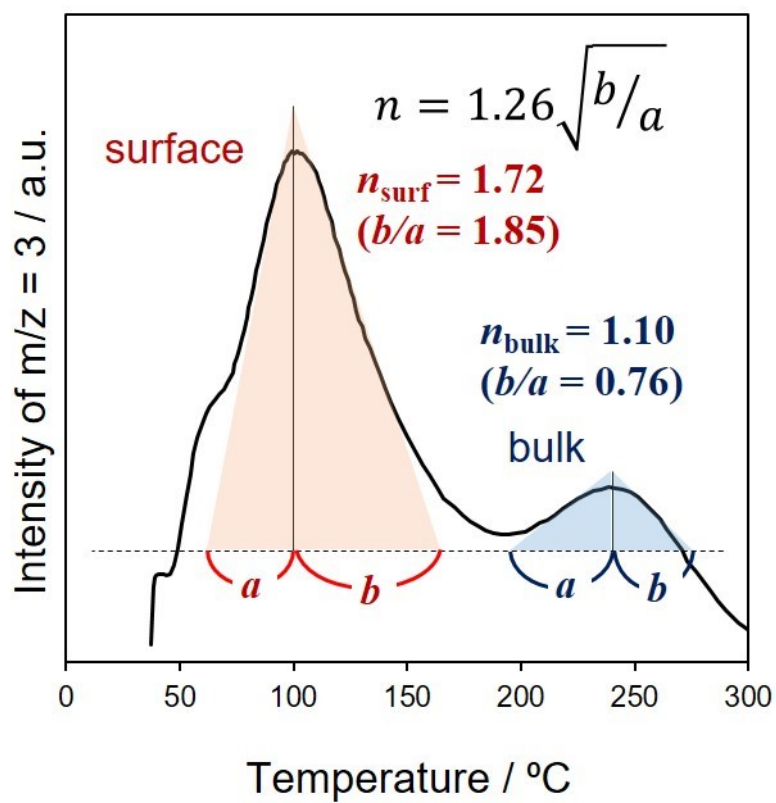

**Fig. S31.** The geometrical approach to obtain the reaction order ( $n_{\text{surf}}$  and  $n_{\text{bulk}}$ ) from the result of MS measurement.



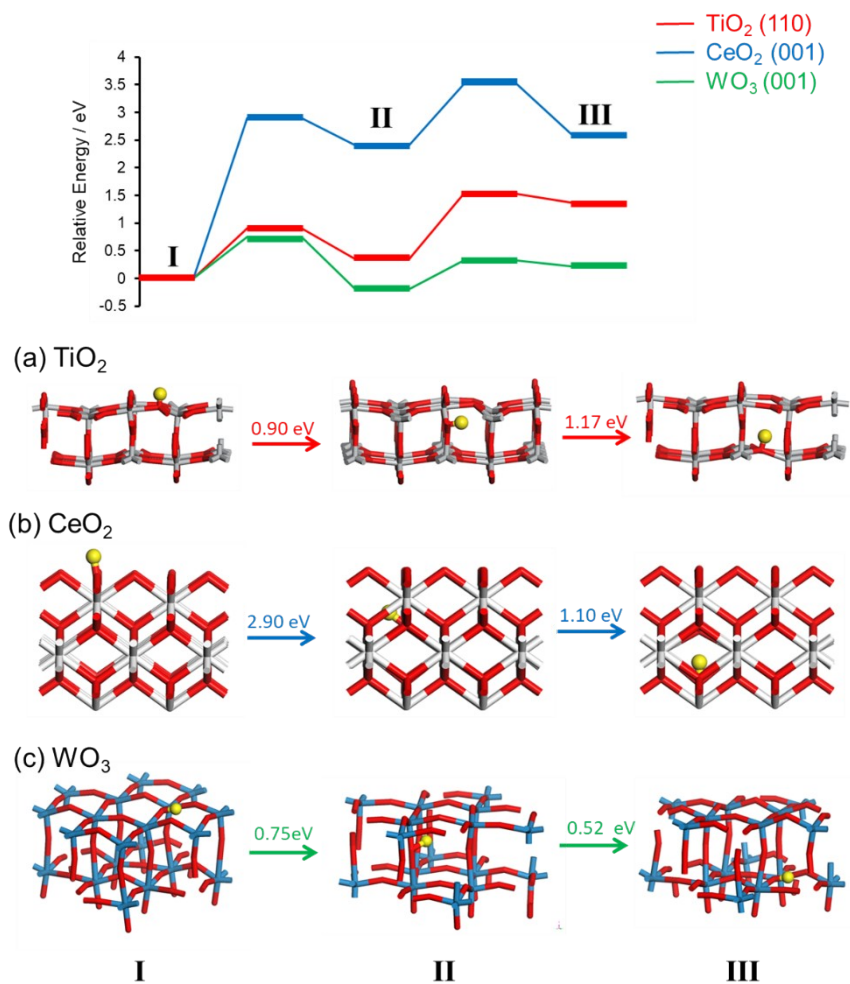

**Fig. S32** Energy profiles and calculated models for H atom migration from the top surface to the first and second inside oxide layers on (a) TiO<sub>2</sub> (110), (b) CeO<sub>2</sub> (001), and (c) WO<sub>3</sub> (001). Yellow ball (H), red stick (O), gray stick (Ti), white stick (Ce), and blue stick (W).
